# Supplementary material for: Characterization of vertigo and hearing loss in patients with Fabry disease
Source: Springer Nature journal article supplement (doi:10.1186/s13023-018-0882-7), 2018-08-15

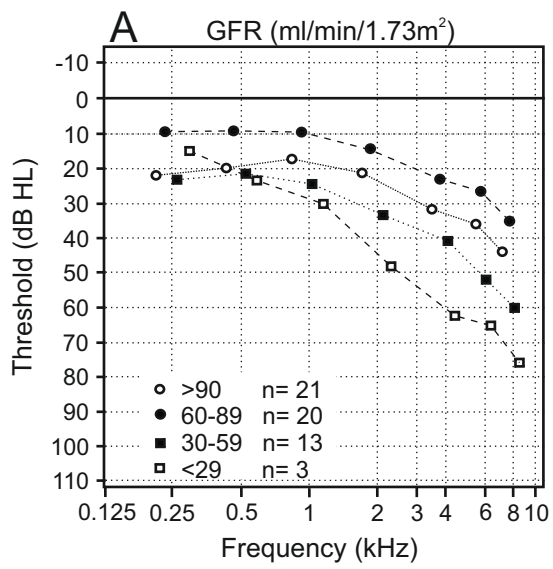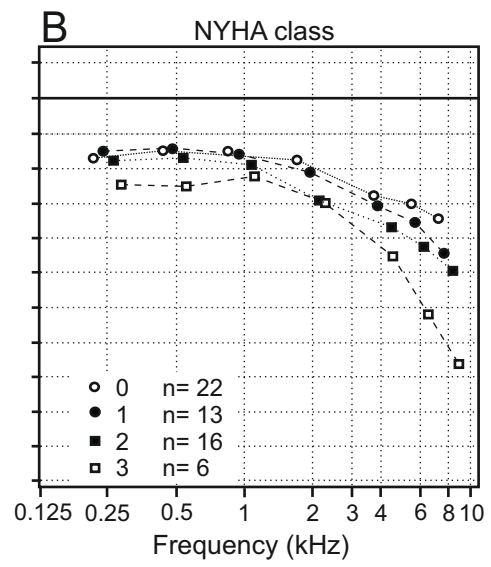

Supplement: MOESM1 [file 16039670]
